# Supplementary material for: Rapid Antidepressant Activity of Ethanol Extract ofGardenia jasminoidesEllis Is Associated with Upregulation of BDNF Expression in the Hippocampus
Source: Hindawi journal article supplement (doi:10.1155/2015/761238), 2015-01-01

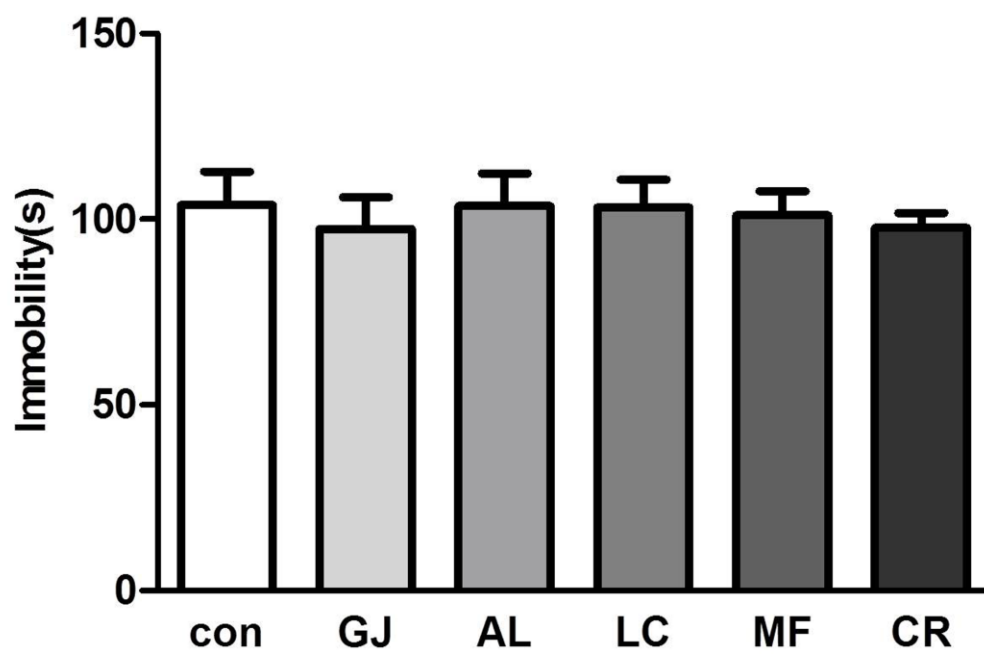

Supplement: f1 [file 761238.f1.pdf]
